# Supplementary material for: Effectiveness of a blended school-based mindfulness program for the prevention of co-rumination and internalizing problems in Dutch secondary school girls: a cluster randomized controlled trial
Source: Springer Nature journal article supplement (doi:10.1186/s13063-023-07885-x), 2024-01-11

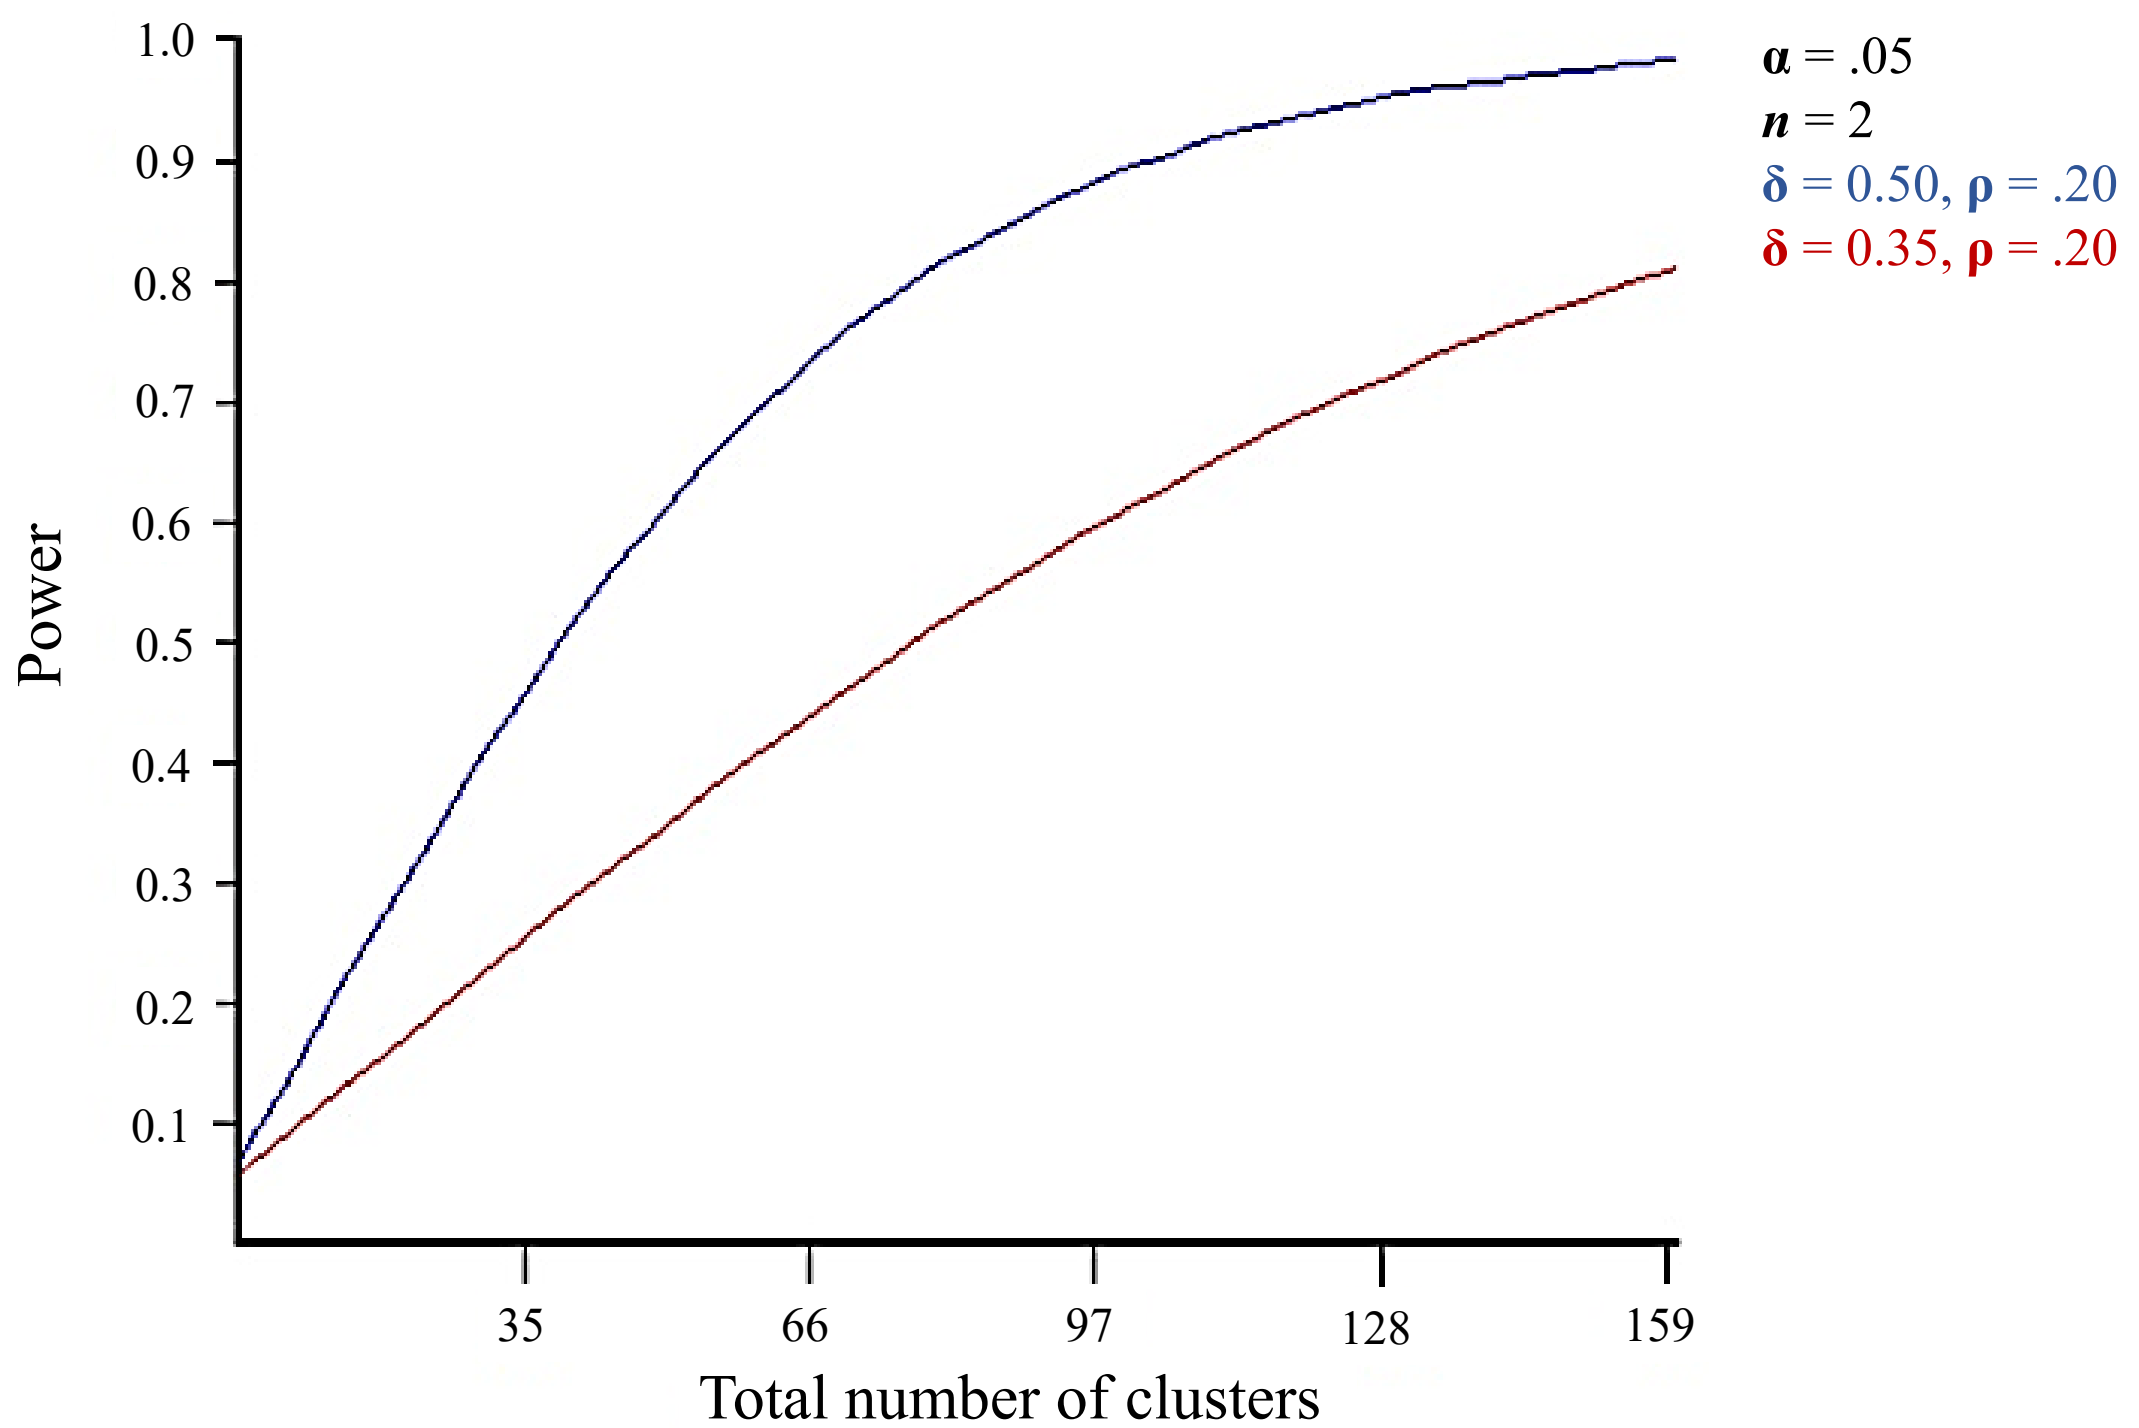

Supplement: MOESM2 [file 26622270]
